# Supplementary material for: Ubiquitin-Specific Protease 2 Regulates Hepatic Gluconeogenesis and Diurnal Glucose Metabolism Through 11β-Hydroxysteroid Dehydrogenase 1
Source: PubMed Central journal article supplement — Diabetes. 2012 Apr 13;61(5):1025–35. doi: 10.2337/db11-0970 (PMC3331773; doi:10.2337/db11-0970), 2012-04-13
Supplement: supp_db11-0970_DB110970SupplementaryData.pdf [file supp_db11-0970_DB110970SupplementaryData.pdf]

SUPPLEMENTARY DATA

**Supplementary Figure 1.** RNAi knockdown of USP2. Immunoblots of lysates from 293 cells transiently transfected with HA-USP2-45 in the presence of control or two shRNA constructs directed against USP2. The sequences of the shRNA targets are indicated.

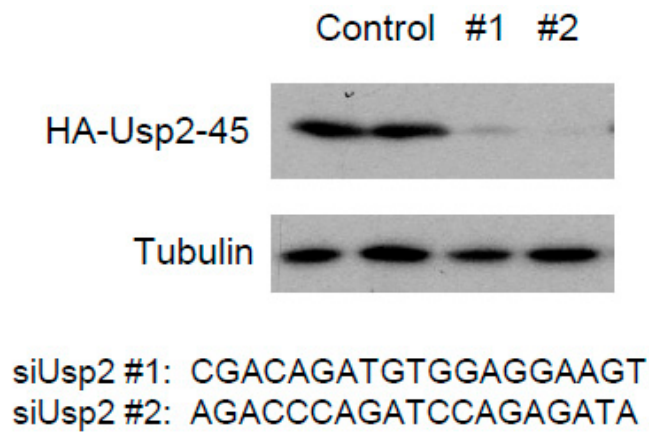

**Supplementary Figure 2.** Effects of USP2 RNAi knockdown on the induction of gluconeogenesis by PGC-1 $\alpha$ . *A*: Glucose secretion assay in hepatocytes transduced with GFP or PGC-1 $\alpha$  adenovirus in the presence of control (Scrb, open) or siUSP2 (filled) adenovirus for 48 hrs. Shown is relative glucose secretion rate in triplicate wells following normalization to respective protein content. *B*: Gene expression analysis in transduced hepatocytes. \*  $p < 0.01$  Scrb vs. siUSP2.

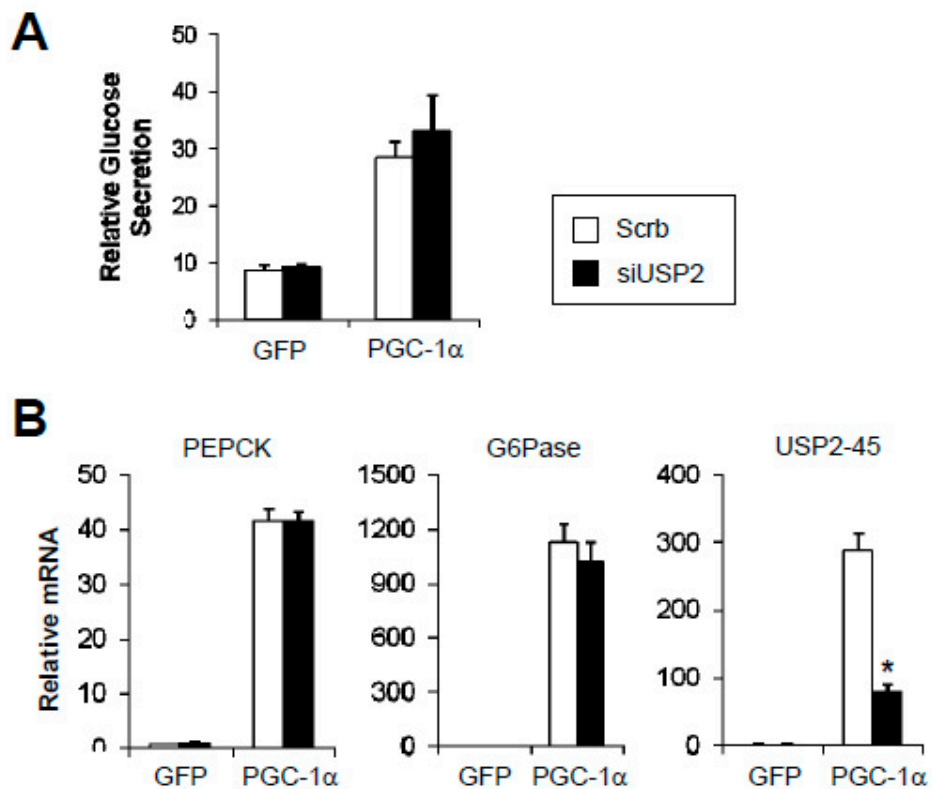

SUPPLEMENTARY DATA

**Supplementary Figure 3.** Hepatic USP2-45 overexpression in high-fat fed mice. *A*: PAS staining of liver sections from mice transduced with GFP or USP2-45 adenovirus. *B*: ITT in transduced mice. Graph represents normalized glucose levels as shown Fig. 4F.

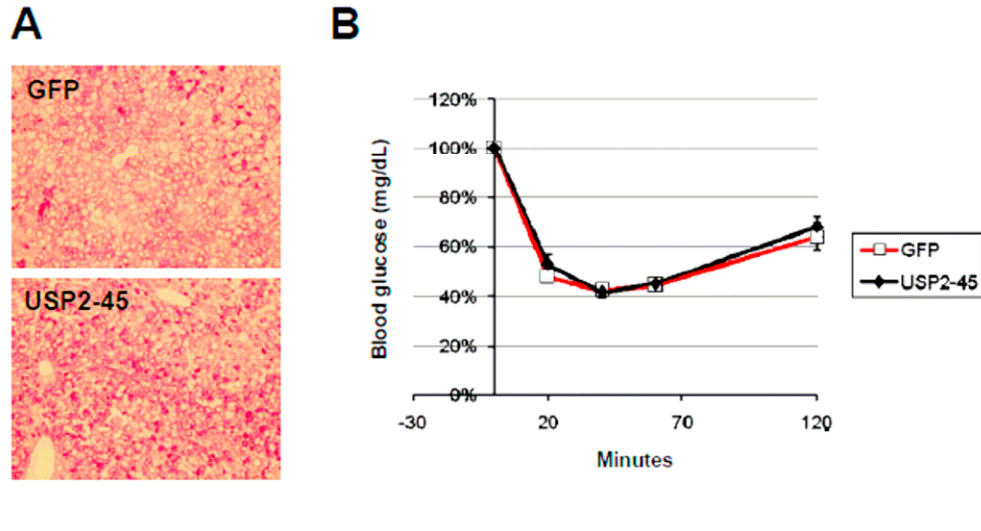

**Supplementary Figure 4.** RNAi knockdown of USP2 in high-fat fed mice. *A*: PAS staining of liver sections from mice transduced with control or siUSP2 adenovirus. *B*: ITT in transduced mice. Graph represents normalized glucose levels as shown Fig. 6E.

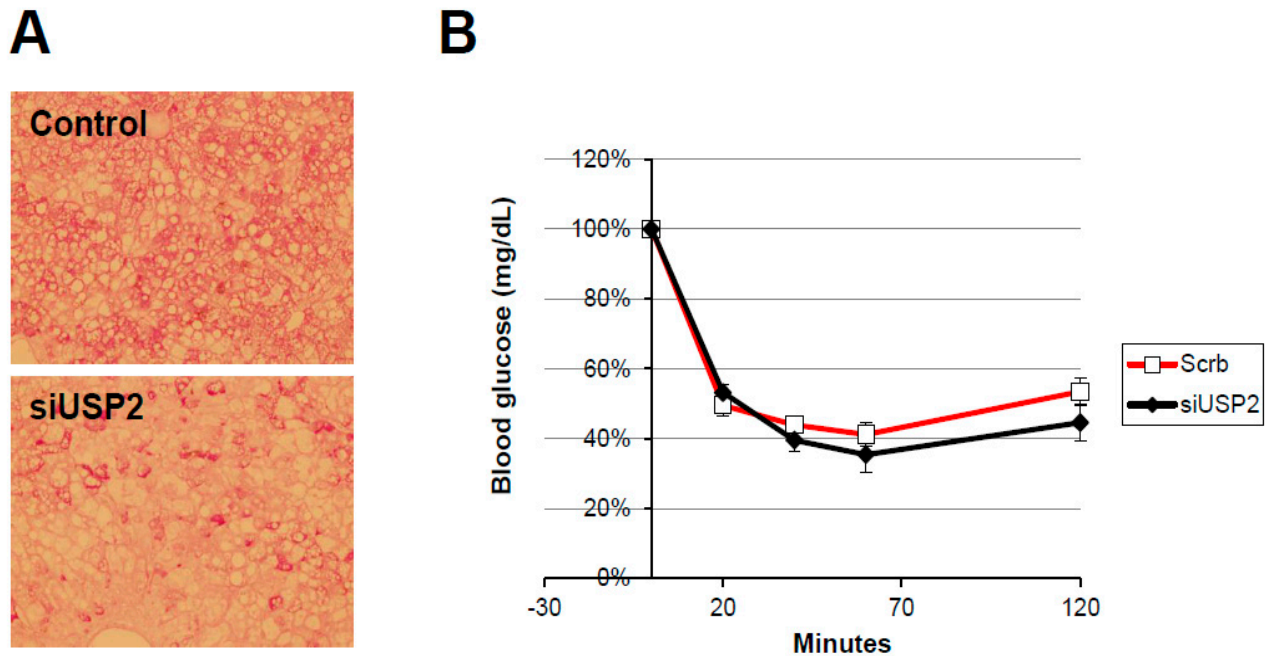

SUPPLEMENTARY DATA

**Supplementary Figure 5.** List of qPCR primers.

| <i>Gene</i>                   | <i>Fwd Sequence</i>        | <i>Rev Sequence</i>        |
|-------------------------------|----------------------------|----------------------------|
| <b>TSC22D3</b>                | 5'- CCTCAACACTGACAAGCTGAAC | 5'- CCTCAACACTGACAAGCTGAAC |
| <b>ANGPTL4</b>                | 5'- GACTCAGCTCAAGGCTCAAAAC | 5'- TTCCCCTCGAAGTCTTGTCTAC |
| <b>DUSP1</b>                  | 5'- GATCCTGTCCTTCCTGTACCTG | 5'- GTGACCCTCAAAGTGGTTAGGA |
| <b>HSD1</b>                   | 5'- GGAGGAAGGTCTCCAGAAGGT  | 5'- AGAGACAGCGAGGTCTGAGTG  |
| <b>TNF<math>\alpha</math></b> | 5'- AGCCCCCAGTCTGTATCCTT   | 5'- CTCCTTTGCAGAACTCAGG    |
| <b>CCL2</b>                   | 5'- AGGTCCCTGTCATGCTTCTG   | 5'- TCTGGACCCATTCTTCTTG    |
| <b>IL6</b>                    | 5'- AGTTGCCTTCTTGGGACTGA   | 5'- TCCACGATTTCCAGAGAAC    |
| <b>USP2-45</b>                | 5'-GCTTCTGCTCAACAAAGCCA    | 5'- CTCAGATGGGCTCACCACATC  |
| <b>USP2-69</b>                | 5'- AGCCAGGACTCATCCGCAGCT  | 5'-CTCAGATGGGCTCACCACATC   |
